# Supplementary material for: High-energy density nanofiber-based solid-state supercapacitors
Source: Royal Society of Chemistry journal article supplement (doi:10.1039/c5ta05552k), 2015-11-19
Supplement: c5ta05552k1.pdf [file c5ta05552k1.pdf]

## Electronic Supplementary Information

### High-energy Density Nanofiber-based Solid-state Supercapacitors

Daniel Lawrence<sup>a</sup>, Chau Tran<sup>a</sup>, Arun T. Mallajoyula<sup>b</sup>, Stephen K. Doorn<sup>b</sup>, Aditya Mohite<sup>b</sup>,  
Gautam Gupta<sup>b,\*</sup>, and Vibha Kalra<sup>a,\*</sup>

<sup>a</sup>Department of Chemical and Biological Engineering, Drexel University, 3141 Chestnut Street,  
Philadelphia, Pennsylvania 19104, USA

<sup>b</sup>Materials Physics and Applications-11, Los Alamos National Laboratory, NM, 87545

\*Corresponding Authors: [vk99@drexel.edu](mailto:vk99@drexel.edu) (V. Kalra), [gautam@lanl.gov](mailto:gautam@lanl.gov) (G. Gupta)

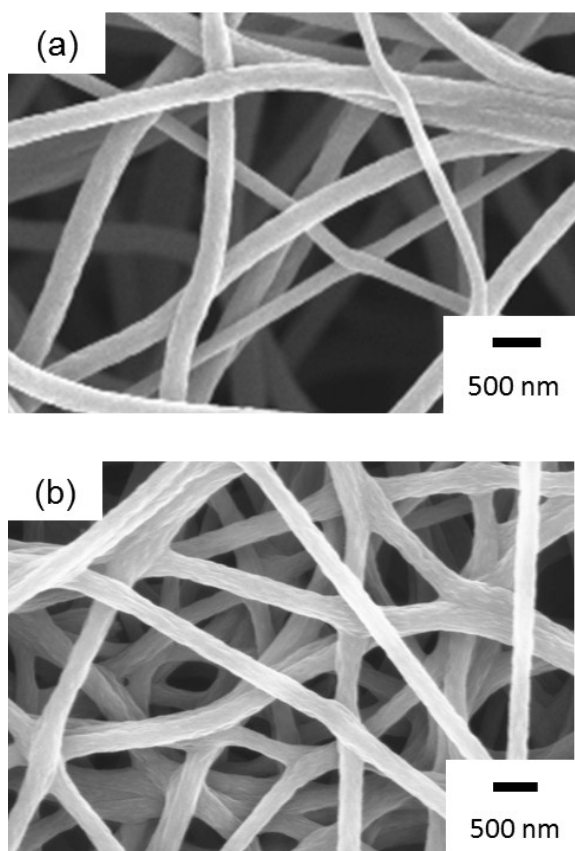

**Fig. S1.** SEM images of carbon nanofiber mats (a) PCNF and (b) A-PCNF (activated).

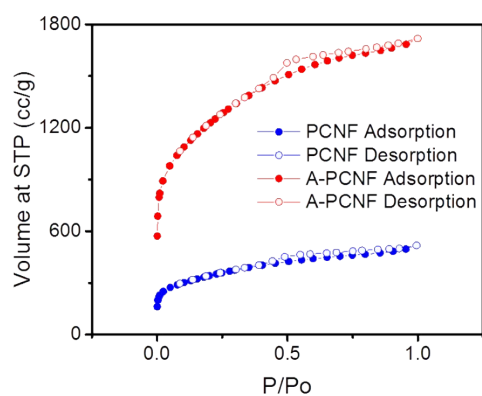

**Fig. S2.** Adsorption and desorption isotherms for PCNF and A-PCNF.

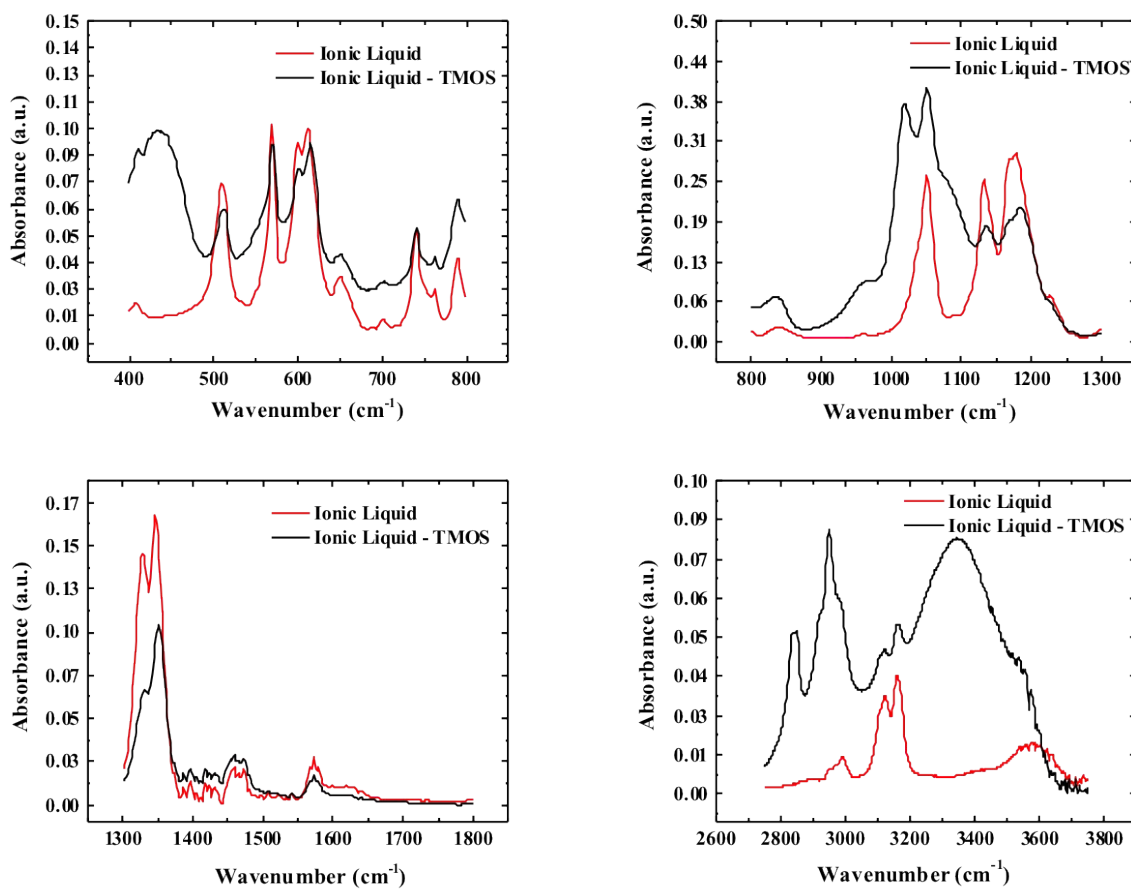

**Fig. S3.** FTIR spectra of ionic liquid electrolyte with and without TMOS gelation.

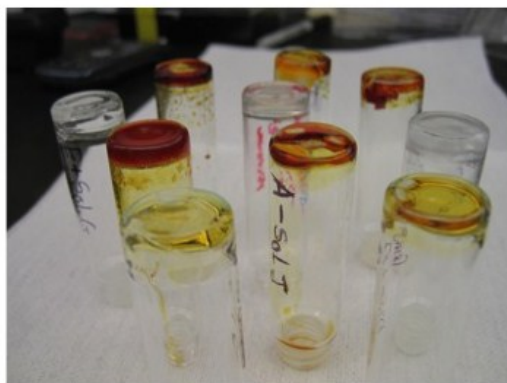

**Fig. S4.** Pictures of gelled ionic liquid in vials.

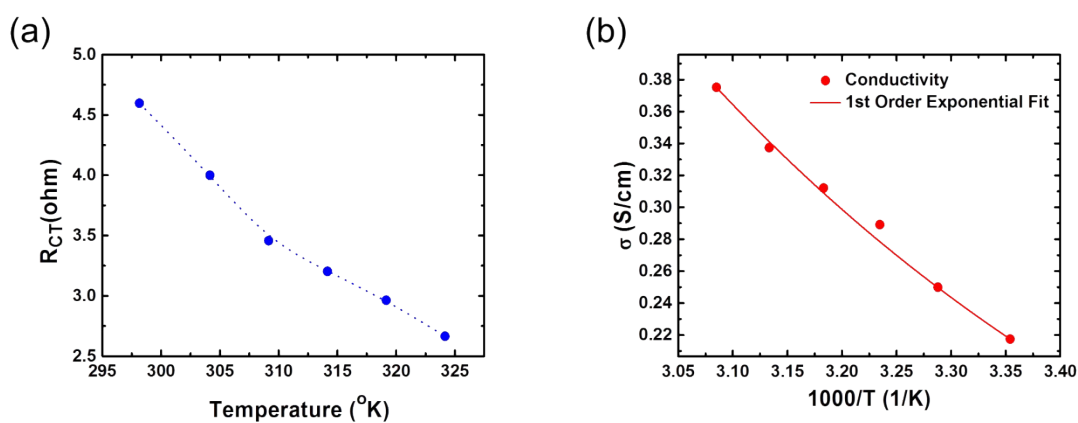

**Fig. S5.** (a) Variation of charge transfer resistance of solid-state EMIM TFSI electrolyte with temperature. The electrolyte is prepared using tetramethoxysilane (TMOS). (b) Conductivity of EMIM TFSI solid-state electrolyte as a function of inverse temperature. The data fits well to first order exponential, indicating that it tends to follow VFT behavior.

**Table S1:** Temperature dependence of the charge transfer resistance of solid-state EMIM TFSI electrolyte.

| Temperature | R <sub>ct</sub> (Ω) | 1000/T | σ (S/cm) |
|-------------|---------------------|--------|----------|
| 298.15      | 4.60                | 3.35   | 0.217    |
| 304.15      | 4.00                | 3.29   | 0.249    |
| 309.15      | 3.46                | 3.23   | 0.289    |
| 314.15      | 3.20                | 3.18   | 0.312    |
| 319.15      | 2.96                | 3.13   | 0.337    |
| 324.15      | 2.66                | 3.08   | 0.375    |

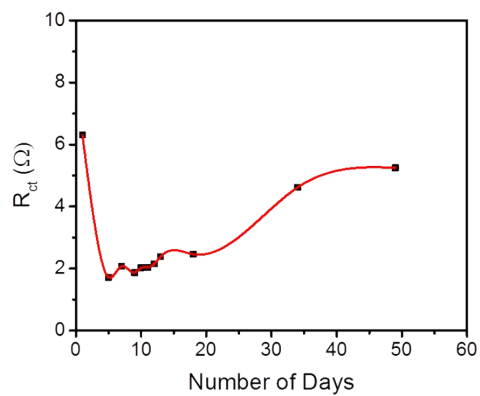

**Fig. S6.** Time dependence of charge transfer resistance of the solid-state EMIM TFSI electrolyte.

**Table S2:** Time dependence of the charge transfer resistance of solid-state EMIM TFSI electrolyte.

| <b>Day</b> | <b>R<sub>ct</sub> (<math>\Omega</math>)</b> |
|------------|---------------------------------------------|
| 1          | 6.305                                       |
| 5          | 1.715                                       |
| 7          | 2.079                                       |
| 9          | 1.8705                                      |
| 10         | 2.029                                       |
| 11         | 2.036                                       |
| 12         | 2.148                                       |
| 13         | 2.387                                       |
| 18         | 2.4615                                      |
| 34         | 4.616                                       |
| 49         | 5.25                                        |

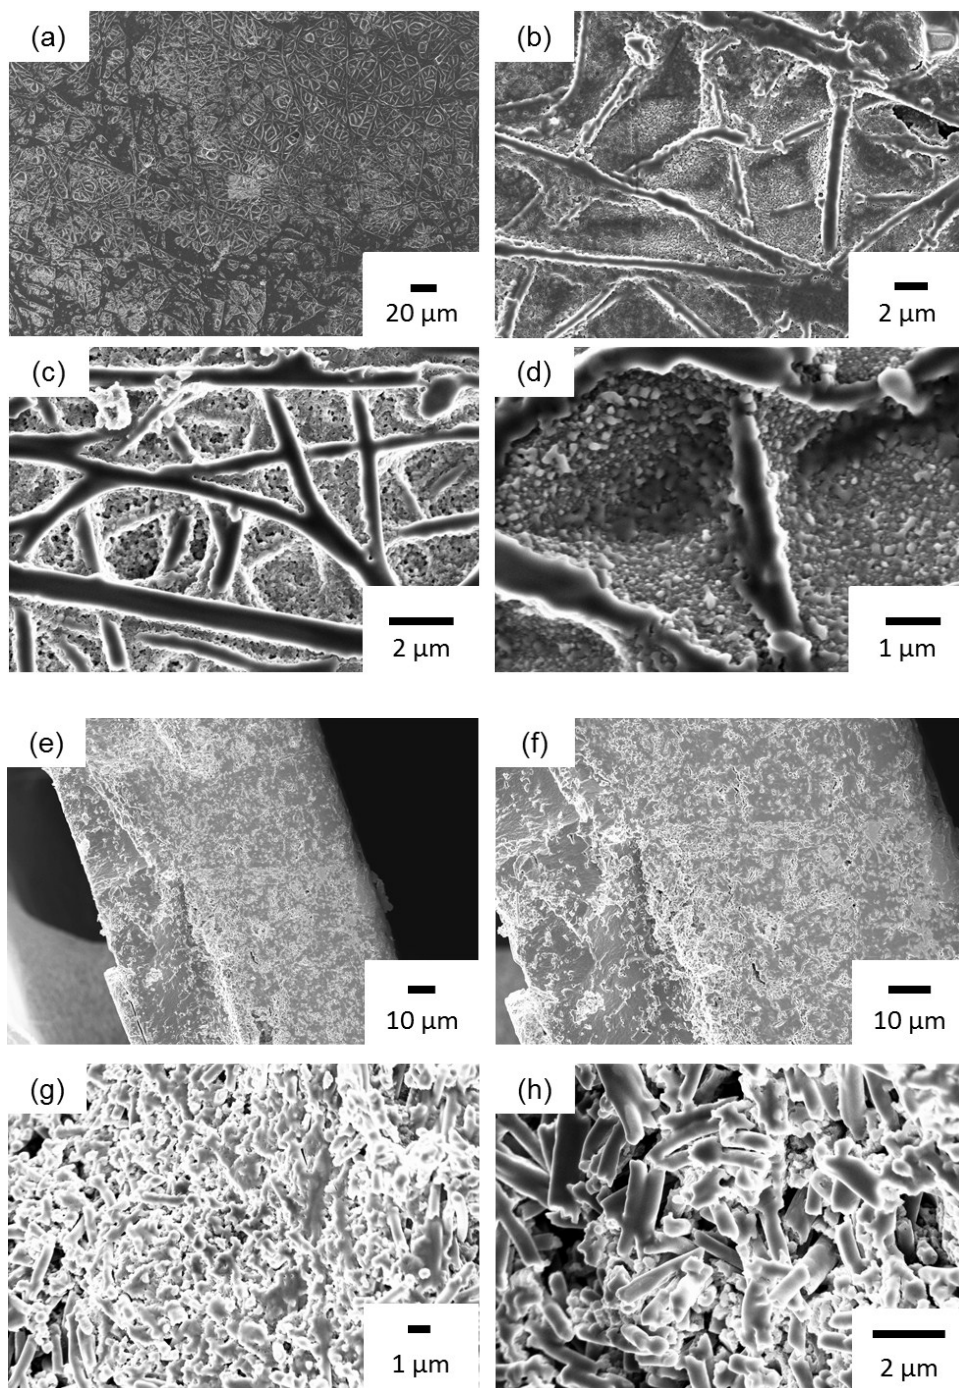

**Fig. S7.** SEM images of PCNF electrodes filled with solid electrolyte from a (a-d) top-down and (e-h) cross-sectional view.

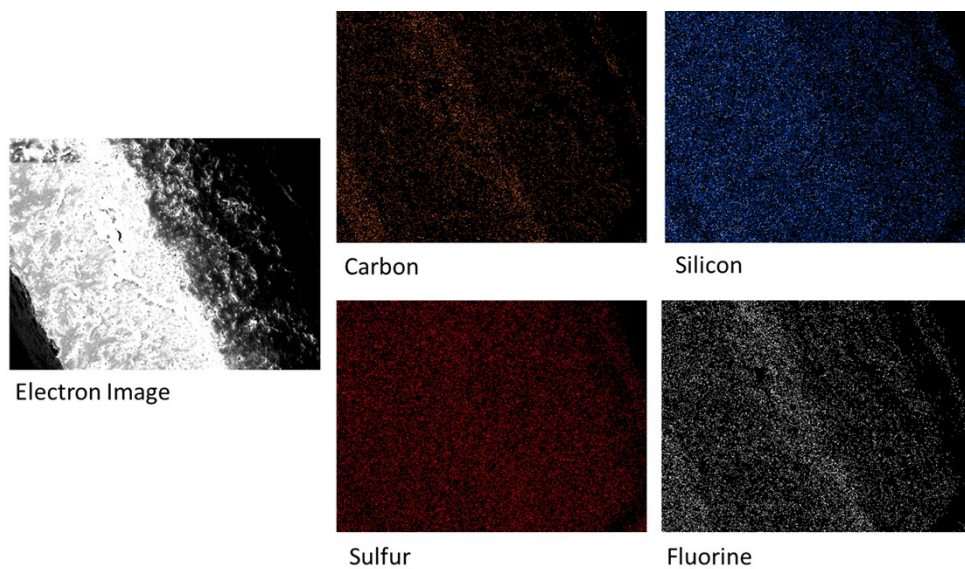

**Fig. S8.** Solid electrolyte-filled PCNF cross-section EDS showing uniform distribution of TMOS (Si) and EMIM TFSI (S, F).

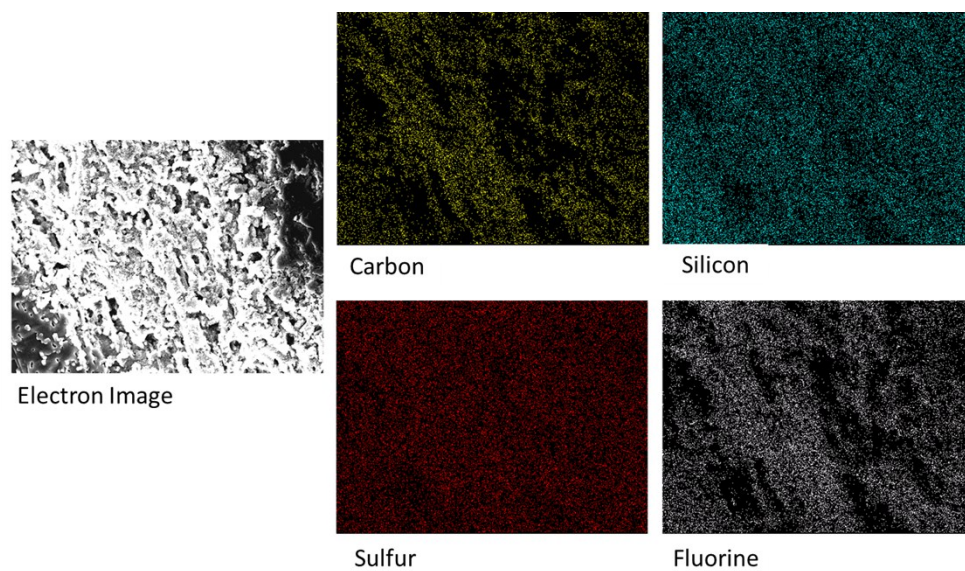

**Fig. S9.** Solid electrolyte-filled PCNF EDS (top surface) showing uniform distribution of TMOS (Si) and EMIM TFSI (S, F).

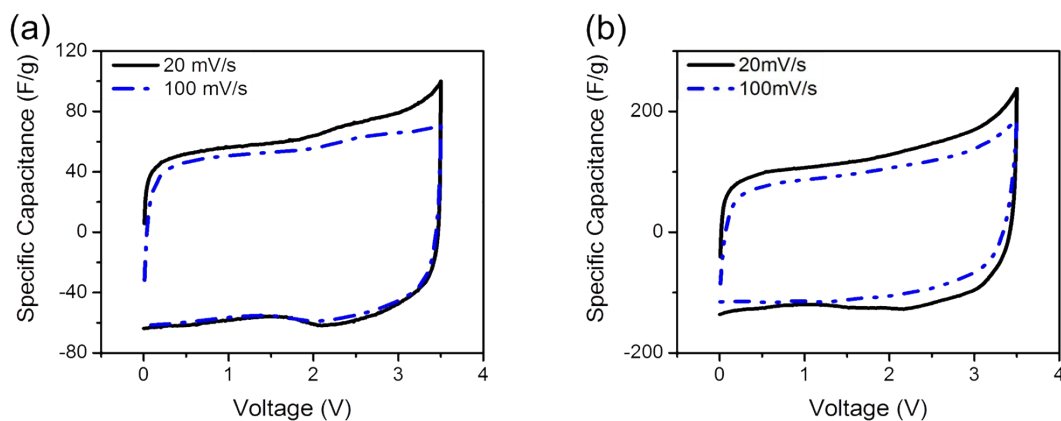

**Fig. S10.** CV curves of liquid ionic liquid electrolyte devices using the following samples as electrodes (a) PCNF and (b) A-PCNF. PCNF exhibits a capacitance of  $59.5 \text{ F g}^{-1}$  and  $54 \text{ F g}^{-1}$  at 20 and  $100 \text{ mV s}^{-1}$  respectively. A-PCNF exhibits a capacitance of  $125 \text{ F g}^{-1}$  and  $101 \text{ F g}^{-1}$  at 20 and  $100 \text{ mV s}^{-1}$  respectively.

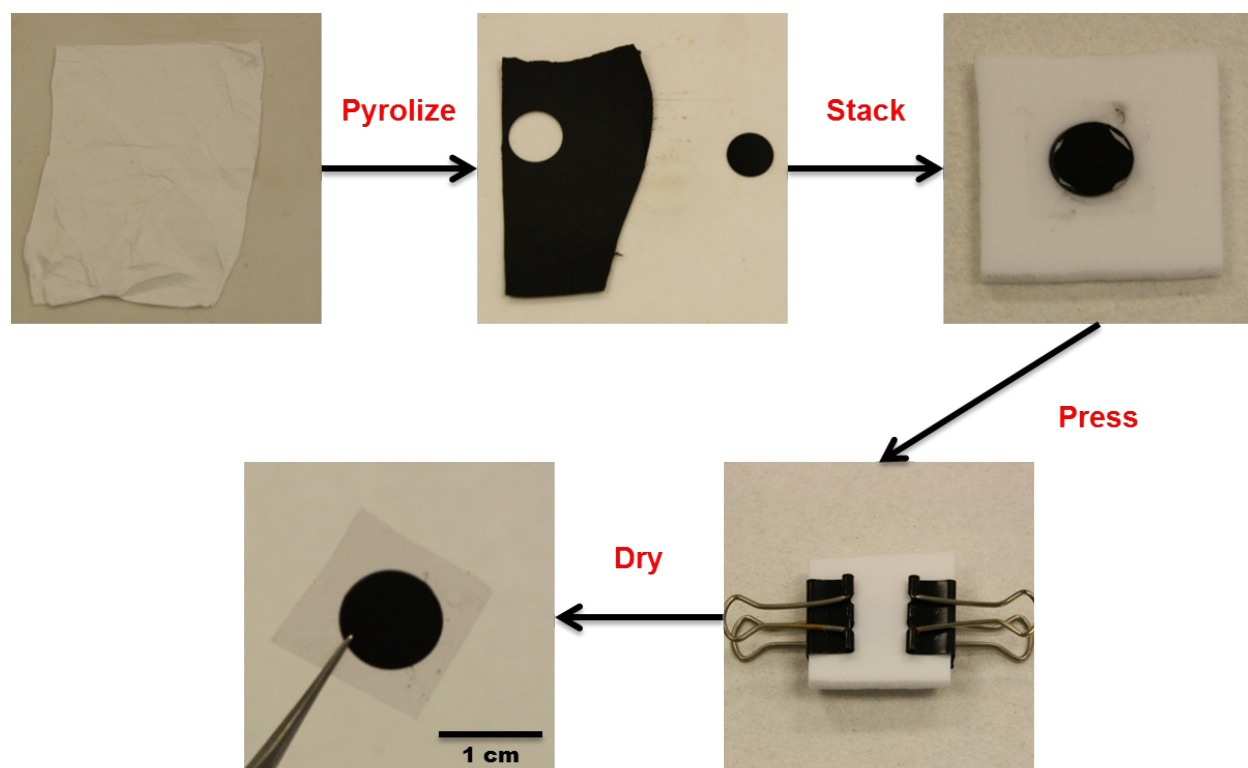

**Fig. S11.** Schematic showing the detailed step-by-step process used for solid-state device fabrication.



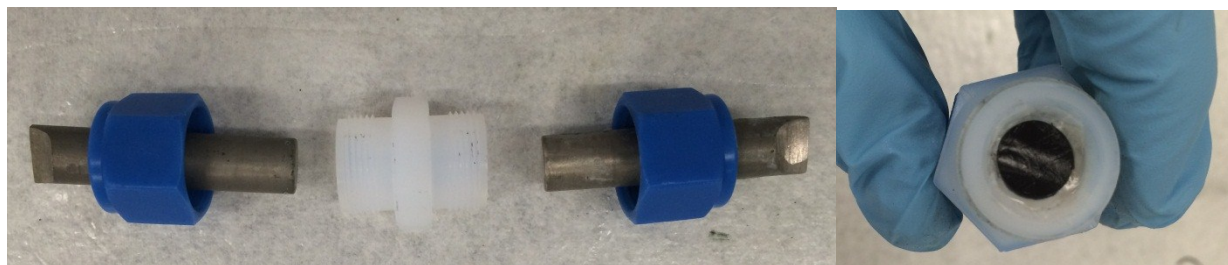

**Fig. S12.** Photograph representation of the Swagelok cell and the solid-state supercapacitor insert.
